# Supplementary material for: What Works to Improve Nutrition and Food Sustainability across the First 2000 Days of Life: A Rapid Review
Source: MDPI journal article supplement (doi:10.3390/nu14040731), 2022-02-09
Supplement: s1 [file s1]

**Table S1. Search terms**

| Category     | Search String                                                                                                                                                                 |
|--------------|-------------------------------------------------------------------------------------------------------------------------------------------------------------------------------|
| Population   | pregn* OR p#ediatr* OR infan* OR toddler* OR preschool* OR "pre school*" OR "pre-school*" OR baby OR babies OR neonat*                                                        |
| Intervention | diet* OR nutrit* OR "family meal*" OR "responsive feeding" OR discretionary OR breastfeeding OR "breast feeding" OR "bottle feeding" OR bottlefeeding OR "formula feed"       |
|              | fruit OR vegetable* OR "soft drink" OR "sugar sweetened beverage"                                                                                                             |
|              | food N2 supply OR sustainab* OR culture OR environment OR practice* OR afford* OR access* OR practices OR literacy                                                            |
|              | "community market*" OR "farmers market*" OR "local government" OR "local council" OR "local authorit*" OR "health service*" OR "health setting*" OR "child care" OR childcare |
|              | "point of purchase" OR "marketing" OR "outdoor advertising" OR "policy"                                                                                                       |
| Study types  | "systematic review" OR "meta analys*"                                                                                                                                         |
